# Supplementary material for: Laplacian Eigenfunctions Learn Population Structure
Source: PubMed Central journal article supplement (PMC2779848; doi:10.1371/journal.pone.0007928), 2009-12-01

Supplementary Figure 2 for:

# Laplacian eigenfunctions Learn Population Structure

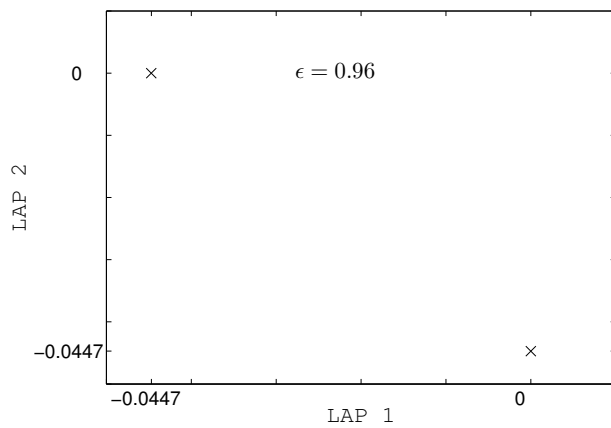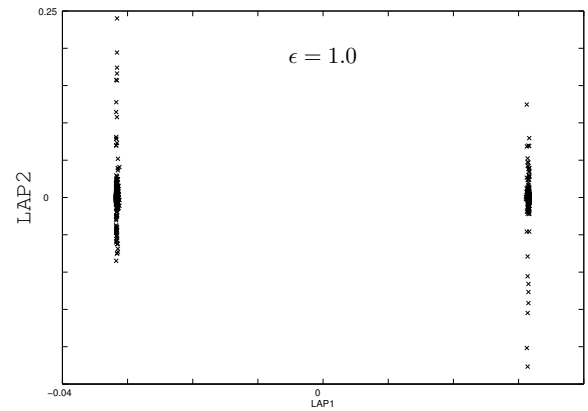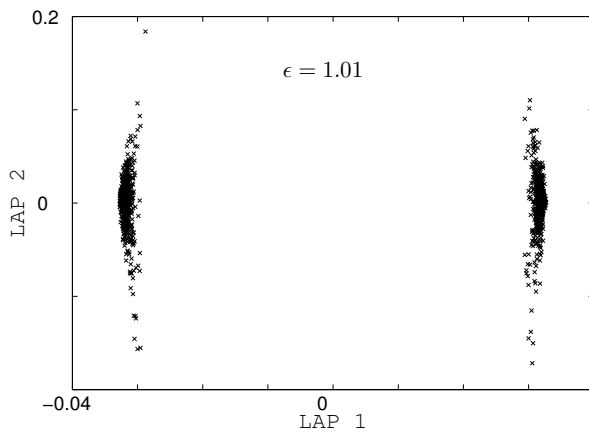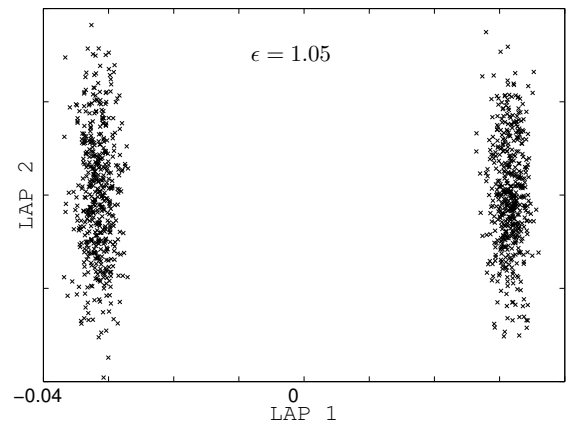

Supplement: pone.0007928.s003.pdf [file pone.0007928.s003.pdf]
